# Supplementary material for: Hidden shift of the ionome of plants exposed to elevated CO2 depletes minerals at the base of human nutrition
Source: eLife. 2014 May 7;3:e02245. doi: 10.7554/eLife.02245 (PMC4034684; doi:10.7554/eLife.02245)
Supplement: Figure 1—source data 1. — DOI: http://dx.doi.org/10.7554/eLife.02245.015 [file elife02245s001.xlsx]

## Sheet: Results
Table S1
data subset	mean	0.025	0.975	SEM	m	power	p-value
all minerals	-8.04	-9.14	-6.92	0.62	1254	1	< 0.00001
crops, all tissues, all minerals	-7.22	-8.6	-5.85	0.75	844	1	< 0.00001
edible, all minerals	-6.43	-7.83	-5.06	0.76	534	1	< 0.00001
grain, all minerals	-7.36	-8.89	-5.84	0.86	367	1	< 0.00001
herbaceous, all minerals	-7.46	-8.73	-6.21	0.7	951	1	< 0.00001
non-FACE, all minerals	-8.73	-10.12	-7.35	0.77	920	1	< 0.00001
all minerals, Germany	-7.51	-9.45	-5.58	1.07	285	0.99	< 0.00001
all minerals, temperate	-6.44	-7.85	-5.02	0.77	557	0.99	< 0.00001
all minerals, wheat	-7.66	-9.36	-5.9	0.96	280	0.99	< 0.00001
edible, all minerals, wheat	-7.59	-9.31	-5.88	0.94	212	0.99	< 0.00001
edible, Mg	-5	-7.25	-3.04	1.18	48	0.99	6e-05
edible, wheat, all minerals	-7.59	-9.27	-5.91	0.94	212	0.99	< 0.00001
FACE, all minerals	-6.11	-7.83	-4.41	0.95	334	0.99	< 0.00001
FACE, all minerals, wheat	-6.31	-8.06	-4.58	0.96	142	0.99	< 0.00001
FACE, crop, all minerals	-6.28	-7.98	-4.55	0.95	284	0.99	< 0.00001
FACE, edible, all minerals	-5.69	-7.5	-3.88	0.99	249	0.99	< 0.00001
FACE, grain wheat, all minerals	-5.77	-7.55	-4.01	0.97	130	0.99	< 0.00001
FACE, grain, all minerals	-6.16	-8	-4.32	1.01	231	0.99	< 0.00001
FACE, herbaceous, all minerals	-6.28	-8.03	-4.55	0.95	284	0.99	< 0.00001
foliar, all minerals	-9.23	-10.83	-7.58	0.9	720	0.99	< 0.00001
foliar, wild, all minerals	-9.72	-11.57	-7.88	1.07	410	0.99	< 0.00001
non-FACE, crop, all minerals	-7.69	-9.57	-5.84	1.03	560	0.99	< 0.00001
non-FACE, edible, all minerals	-7.06	-9.14	-5.11	1.12	285	0.99	< 0.00001
non-FACE, foliar, all minerals	-9.48	-11.25	-7.74	0.98	635	0.99	< 0.00001
non-FACE, herbaceous, all minerals	-7.96	-9.57	-6.33	0.91	667	0.99	< 0.00001
non-FACE, wild, all minerals	-10.34	-12.27	-8.34	1.13	360	0.99	< 0.00001
potato, K	-2.7	-4.58	-0.75	1.08	17	0.99	0.01847
wild, all tissues, all minerals	-9.72	-11.61	-7.81	1.07	410	0.99	< 0.00001
FACE, K	-2.57	-5	-0.38	1.27	21	0.98	0.04798
foliar, herbaceous, all minerals	-8.77	-10.96	-6.56	1.26	417	0.98	< 0.00001
FACE, Mg	-4.26	-6.76	-1.95	1.37	21	0.97	0.00383
woody, all minerals	-9.85	-12.16	-7.57	1.33	303	0.97	< 0.00001
foliar, woody, all minerals	-9.85	-12.2	-7.53	1.33	303	0.96	< 0.00001
K	-7.33	-9.83	-5	1.33	85	0.96	< 0.00001
all minerals, USA	-4.31	-6.81	-1.73	1.39	218	0.95	0.00159
Ca	-6.56	-9.06	-4.07	1.38	139	0.95	< 0.00001
FACE, S	-7.48	-10.03	-5.06	1.47	19	0.95	3e-05
edible, K	-1.6	-4.31	1.18	1.44	47	0.94	0.26181
edible, P	-5.05	-7.81	-2.44	1.48	49	0.94	0.00082
Mg	-9.5	-12.07	-7.05	1.43	123	0.94	< 0.00001
non-FACE, woody, all minerals	-10.74	-13.26	-8.24	1.44	253	0.94	< 0.00001
N	-15.35	-17.82	-13.05	1.47	140	0.93	< 0.00001
all minerals, chrysanth	-6.52	-9.29	-3.84	1.58	20	0.92	0.0003
crop, Zn	-10.53	-13.15	-7.92	1.52	95	0.92	< 0.00001
edible, Zn	-11.36	-13.92	-8.8	1.52	65	0.92	< 0.00001
foliar, all minerals, chrysanth	-6.52	-9.34	-3.86	1.58	20	0.92	0.0003
grains, Mg	-6.09	-9.05	-3.51	1.58	33	0.92	0.00035
grains, S	-9.11	-11.77	-6.54	1.53	25	0.92	< 0.00001
non-FACE, all minerals, chrysanth	-6.52	-9.32	-3.82	1.58	20	0.92	0.0003
Zn	-9.39	-11.97	-6.77	1.47	123	0.92	< 0.00001
FACE, P	-5.66	-8.51	-2.87	1.6	32	0.91	0.00076
non-FACE, grain, all minerals	-9.38	-12.09	-6.71	1.54	136	0.91	< 0.00001
non-FACE, K	-8.24	-11.05	-5.54	1.56	107	0.91	< 0.00001
foliar, crops, all minerals	-8.56	-11.34	-5.72	1.59	310	0.9	< 0.00001
non-FACE, Ca	-6.87	-9.78	-3.99	1.59	117	0.89	1e-05
wild, K	-11.47	-14.23	-8.78	1.63	48	0.89	< 0.00001
FACE, N	-12.09	-14.76	-9.33	1.68	18	0.88	< 0.00001
non-FACE, N	-15.81	-18.52	-13.21	1.66	122	0.88	< 0.00001
potato, Mg	-1.61	-4.6	1.57	1.72	17	0.88	0.34225
all minerals, potato	-4.98	-8.34	-2.03	1.72	119	0.87	0.00315
non-FACE, all minerals, potato	-4.98	-8.35	-2.07	1.72	119	0.87	0.00315
non-FACE, Mg	-10.55	-13.53	-7.75	1.69	102	0.87	< 0.00001
wheat grains, Mg	-7.39	-11.11	-4.72	1.93	19	0.87	0.00063
edible, S	-6.86	-9.65	-3.8	1.67	33	0.86	0.00012
crop, N	-14.15	-17.11	-11.37	1.76	81	0.85	< 0.00001
foliar, K	-9.95	-13.09	-7.04	1.76	86	0.85	< 0.00001
non-FACE, all minerals, wheat	-9.02	-11.95	-5.99	1.69	138	0.85	< 0.00001
wild, Mg	-11.27	-14.38	-8.38	1.8	39	0.85	< 0.00001
edible, N	-13.99	-16.7	-11.05	1.76	40	0.83	< 0.00001
grains, Zn	-10.69	-13.75	-7.69	1.79	48	0.83	< 0.00001
crop, K	-4.76	-8.28	-1.52	1.84	80	0.82	0.00875
foliar, K	-10.51	-13.75	-7.47	1.83	81	0.82	< 0.00001
grains, P	-5.65	-9	-2.48	1.84	49	0.82	0.00256
all minerals, tropics & subtropics	-7.25	-10.36	-4.04	1.78	165	0.81	3e-05
C4, all minerals	-2.32	-5.57	1.09	1.81	44	0.81	0.19318
crop, Ca	-6.46	-9.72	-3.21	1.8	92	0.81	0.00029
non-FACE, Zn	-10.01	-13.05	-6.85	1.81	84	0.81	< 0.00001
all minerals, barley	-6.04	-9.39	-2.74	1.84	82	0.8	0.0009
edible, Ca	-4.63	-7.94	-1.26	1.83	55	0.8	0.011
foliar, Ca	-7.86	-11.16	-4.61	1.86	89	0.8	2e-05
foliar, N	-15.21	-18.45	-12.2	1.91	105	0.79	< 0.00001
S	-8.64	-11.67	-5.36	1.8	67	0.79	< 0.00001
crop, Mg	-8.67	-12.08	-5.41	1.93	84	0.78	1e-05
foliar, C	4.29	0.68	8.08	1.89	28	0.78	0.03033
foliar, N	-15.88	-19.06	-12.83	1.94	100	0.78	< 0.00001
non-FACE, grain wheat, all minerals	-10.41	-13.54	-7.17	1.87	82	0.78	< 0.00001
wheat grains, S	-8.54	-12	-5.22	2.07	17	0.78	0.00037
all minerals, Australia	-10.2	-14.34	-6.89	2.24	30	0.76	3e-05
foliar, Ca	-7.8	-11.27	-4.37	1.95	84	0.76	6e-05
P	-9.07	-12.63	-5.71	1.95	152	0.76	< 0.00001
FACE, Ca	-4.86	-8.54	-1.25	2.1	22	0.74	0.02285
foliar, Mg	-11.63	-15.2	-8.27	2.07	80	0.74	< 0.00001
C	6.19	2.58	10.38	1.95	35	0.72	0.00336
crop, P	-5.76	-9.52	-2.1	2.05	87	0.72	0.00427
non-FACE, all minerals, barley	-3.31	-6.79	0.55	1.99	30	0.72	0.09368
all minerals, rice	-6.87	-10.49	-3.17	2.04	120	0.71	0.00057
edible, all minerals, barley	-6.9	-10.53	-3.16	2.09	68	0.71	0.00087
edible, all minerals, potato	-3.52	-8.22	0.29	2.3	81	0.71	0.11621
Cu	-8.62	-12.35	-4.98	2.12	124	0.7	3e-05
Mn	-1.46	-5.37	2.45	2.07	101	0.7	0.47173
wild, Ca	-6.75	-10.63	-3	2.12	47	0.7	0.00158
foliar, Mg	-12.27	-16.01	-8.72	2.17	75	0.69	< 0.00001
foliar, C	4.86	0.91	9.14	2.1	25	0.68	0.02824
wheat grains, Zn	-9.42	-13.38	-5.64	2.31	25	0.66	0.00018
grains, Ca	-6.51	-10.62	-2.54	2.28	36	0.65	0.00457
grains, K	-1.77	-5.91	2.45	2.26	30	0.65	0.42317
grains, N	-14.93	-18.19	-11.34	2.13	26	0.65	< 0.00001
foliar, all minerals, potato	-8.03	-12	-4.11	2.26	38	0.63	0.00052
edible, all minerals, rice	-7.16	-11.31	-3.1	2.31	87	0.62	0.00156
wild, N	-16.96	-21.13	-13.12	2.53	59	0.6	< 0.00001
FACE, foliar, all minerals	-7.33	-11.62	-3.09	2.41	128	0.59	0.00181
wheat grains, P	-6.45	-11.26	-2.1	2.69	21	0.59	0.01815
all minerals, Finland	-6.06	-10.13	-1.73	2.43	21	0.58	0.01488
non-FACE, C	7.47	3.03	12.38	2.3	29	0.58	0.00324
non-FACE, P	-9.96	-14.3	-5.76	2.43	120	0.58	3e-05
crop, S	-7.03	-10.96	-2.63	2.39	44	0.56	0.00319
foliar, Zn	-6.55	-10.83	-2.11	2.43	63	0.56	0.00605
non-FACE, Mn	-0.77	-5.32	3.99	2.46	76	0.55	0.74847
crop, Cu	-8.81	-13.41	-4.35	2.6	94	0.54	0.00048
edible, Mn	-2.33	-6.53	2.37	2.37	43	0.54	0.31455
foliar, P	-10.6	-15.23	-6.17	2.66	108	0.54	4e-05
all minerals, spruce tree	-8.39	-12.96	-3.79	2.65	52	0.52	0.00135
crop, Mn	-3.66	-8.16	1.13	2.51	67	0.52	0.13511
Fe	-10.09	-14.52	-5.61	2.58	125	0.52	5e-05
foliar, all minerals, spruce tree	-8.39	-12.84	-3.79	2.65	52	0.52	0.00135
foliar, Zn	-7.14	-11.69	-2.55	2.62	58	0.52	0.00547
non-FACE, all minerals, pine tree	-5.84	-10.36	-1.19	2.56	39	0.52	0.02086
non-FACE, all minerals, spruce tree	-8.39	-12.92	-3.79	2.65	52	0.52	0.00135
non-FACE, Cu	-5.92	-10.71	-1.19	2.68	80	0.52	0.02286
edible, Fe	-9.74	-14.32	-5.15	2.64	65	0.51	0.00019
FACE, all minerals, barley grain	-7.59	-12.18	-2.92	2.67	52	0.51	0.00389
foliar, P	-10.93	-15.77	-6.32	2.78	103	0.51	5e-05
potato, P	-6.41	-10.76	-1.82	2.67	17	0.51	0.01964
crop, C	7.31	2.39	12.75	2.62	23	0.5	0.01068
FACE, all minerals, rice	-7.4	-12.16	-2.66	2.7	61	0.5	0.00505
foliar, Cu	-9.73	-14.68	-5.11	2.8	77	0.5	0.00037
wheat grains, Mn	-7.18	-11.61	-2.53	2.73	18	0.5	0.01112
FACE, Zn	-8.05	-12.33	-3.36	2.57	39	0.49	0.00186
non-FACE, S	-9.1	-13.12	-4.43	2.47	48	0.49	0.00026
wild, S	-11.65	-15.84	-7.1	2.61	23	0.49	6e-05
wheat grains, Cu	-1.46	-6.43	3.71	2.79	17	0.48	0.59069
all minerals, pine tree	-7.11	-12.5	-2.08	3.01	49	0.47	0.01531
foliar, all minerals, pine tree	-7.11	-12.69	-2.08	3.01	49	0.47	0.01531
foliar, all minerals, wheat	-7.87	-12.58	-2.94	2.73	68	0.47	0.00312
all minerals, white clover	-8.93	-13.47	-4.05	2.73	37	0.46	0.0012
foliar, all minerals, white clover	-8.93	-13.53	-4.07	2.73	37	0.46	0.0012
foliar, wheat, all minerals	-7.87	-12.57	-2.89	2.73	68	0.46	0.00312
non-FACE, all minerals, white clover	-8.93	-13.47	-3.99	2.73	37	0.46	0.0012
potato, N	-11.79	-15.82	-7.1	2.73	16	0.46	0.00023
foliar, Cu	-9.92	-15.06	-4.87	2.96	72	0.45	0.00057
wheat grains, Fe	-15.34	-20.44	-10.6	3.17	25	0.45	1e-05
FACE, grain rice, all minerals	-5.65	-11.04	-0.3	2.98	49	0.44	0.05111
all minerals, China	-13.47	-18.2	-8.57	2.97	45	0.43	1e-05
edible, Cu	-6.79	-12.22	-1.41	3.04	52	0.42	0.02167
foliar, Mn	-1.2	-6.74	4.61	3.01	63	0.4	0.68322
non-FACE, all minerals, rice	-6.32	-11.93	-0.74	3.14	59	0.4	0.03745
wild, Cu	-8.02	-14.02	-2.25	3.47	30	0.38	0.01849
crop, Fe	-10.22	-15.39	-4.63	3.2	95	0.37	0.00087
FACE, Fe	-6.72	-11.81	-1.1	3.03	37	0.37	0.0234
wild, P	-13.33	-19.39	-7.76	3.61	65	0.37	0.00013
all minerals, beech tree	-5.31	-10.64	0.65	3.26	16	0.36	0.09991
all minerals, Japan	4.81	-0.33	11.04	2.92	27	0.36	0.10888
FACE, wild, all minerals	-5.19	-11.29	0.86	3.46	50	0.36	0.12011
FACE, woody, all minerals	-5.19	-11.44	0.86	3.46	50	0.36	0.12011
foliar, all minerals, beech tree	-5.31	-10.61	0.59	3.26	16	0.36	0.09991
foliar, Mn	-0.82	-6.62	5.39	3.2	58	0.36	0.79414
grains, Cu	-10.91	-16.66	-5.23	3.46	40	0.36	0.0014
grains, Fe	-11.94	-17.56	-6.38	3.37	48	0.36	0.00033
non-FACE, all minerals, beech tree	-5.31	-10.7	0.61	3.26	16	0.36	0.09991
wheat grains, Ca	-9.99	-15.72	-4.16	3.5	21	0.35	0.00522
FACE, Cu	-13.32	-18.97	-7.67	3.43	44	0.34	0.0001
foliar, S	-10.34	-15.29	-4.58	3.21	34	0.33	0.00133
non-FACE, Fe	-11.47	-17.06	-5.51	3.45	88	0.33	0.00051
wheat grains, K	-2.26	-8.31	4.33	3.47	19	0.33	0.50005
grains, Mn	-4.37	-9.38	1.81	3.16	28	0.32	0.15487
non-FACE, all minerals, grass	-16.12	-24.3	-9.53	4.92	31	0.32	0.00082
potato, Ca	0.04	-6.14	6.71	3.56	17	0.32	0.99075
all minerals, grass	-16.12	-24.48	-9.49	4.92	31	0.31	0.00082
B	-5.29	-11.78	1.24	3.69	32	0.31	0.13818
foliar, S	-10.34	-15.25	-4.49	3.21	34	0.31	0.00133
non-FACE, grain rice, all minerals	-9.07	-15.51	-2.73	3.75	38	0.31	0.01266
all minerals, oak tree	-0.92	-7.41	6.07	3.58	50	0.3	0.792
all minerals, UK	-9.53	-18.59	-2.13	5.03	31	0.3	0.04687
foliar, all minerals, oak tree	-0.92	-7.3	6.06	3.58	50	0.3	0.792
non-FACE, all minerals, oak tree	-0.92	-7.3	5.96	3.58	50	0.3	0.792
foliar, all minerals, grass	-16.12	-24.29	-9.25	4.92	31	0.29	0.00082
wild, Fe	-9.7	-15.9	-3.24	3.83	30	0.29	0.00983
wild, Mn	3.01	-3.72	10.4	3.68	34	0.29	0.41008
non-FACE, B	-9.46	-16.32	-2.5	4.13	25	0.27	0.01942
foliar, B	-10.16	-17.03	-3.1	4.22	24	0.26	0.01448
foliar, B	-10.02	-17.27	-2.77	4.42	23	0.26	0.02046
foliar, rice, all minerals	-6.09	-13.61	1.41	4.4	33	0.26	0.14765
wild, Zn	-5.41	-11.93	1.74	3.94	28	0.26	0.1542
all minerals, sweetgum tree	-3.99	-10.67	3.49	3.97	30	0.25	0.29632
crop, B	1.33	-7.27	9.62	4.54	17	0.25	0.7625
foliar, all minerals, rice	-6.09	-13.64	1.59	4.4	29	0.25	0.14765
foliar, all minerals, sweetgum tree	-3.99	-10.82	3.54	3.97	30	0.25	0.29632
foliar, Fe	-9.18	-16.44	-1.8	4.34	65	0.25	0.02557
FACE, all minerals, sweetgum tree	-3.99	-10.58	3.71	3.97	30	0.23	0.29632
all minerals, India	-7.86	-16.99	0.56	5.16	29	0.22	0.10864
all minerals, tomato	-6.66	-15.51	2.11	5.16	31	0.21	0.17394
FACE, Mn	-3.53	-9.89	4.34	3.96	25	0.21	0.35443
foliar, Fe	-10.47	-18.1	-2.26	4.54	60	0.21	0.016962
non-FACE, all minerals, tomato	-6.66	-15.65	2.18	5.16	31	0.21	0.17394
edible, all minerals, tomato	-12.42	-21.6	-3.34	5.79	24	0.19	0.02459
all minerals, oilseed rape	0.44	-7.07	9.36	4.52	18	0.18	0.91973
edible, all minerals, oilseed rape	0.44	-6.97	9.7	4.52	18	0.18	0.91973
FACE, all minerals, oilseed rape	0.44	-7.09	9.46	4.52	18	0.18	0.91973
all minerals, rainforest tree	-22.46	-30.59	-13.66	6.16	16	0.17	0.00052
foliar, all minerals, rainforest tree	-22.46	-30.49	-13.66	6.16	16	0.17	0.00052
non-FACE, all minerals, rainforest tree	-22.46	-30.8	-13.61	6.16	16	0.17	0.00052
Cd	-5.26	-18.26	6.93	7.45	28	0.15	0.4503
crop, Cd	-5.26	-18.16	6.89	7.45	28	0.15	0.4503
foliar, all minerals, mango tree	-33.58	-41.29	-25.36	6.69	22	0.14	< 0.00001
all minerals, mango tree	-33.58	-41.52	-25.27	6.69	22	0.13	< 0.00001
all minerals, peppergrass	-16.73	-22.39	-12.08	3.55	14	0.13	0.00011
edible, Na	-7.56	-17.06	0.83	5.56	14	0.13	0.15588
FACE, Na	-7.56	-17.16	0.87	5.56	14	0.13	0.15588
foliar, all minerals, barley	-1.78	-7.82	5.23	3.68	14	0.13	0.61557
foliar, all minerals, peppergrass	-16.73	-22.39	-12.11	3.55	14	0.13	0.00011
non-FACE, all minerals, peppergrass	-16.73	-22.48	-12.07	3.55	14	0.13	0.00011
rice grains, Cu	-16.3	-24.88	-6.33	6.29	15	0.13	0.00922
wheat grains, N	-15.12	-20.25	-9.36	3.65	14	0.13	0.00038
all minerals, radish	1.54	-9.73	14.69	6.58	21	0.12	0.80875
all minerals, soybean	-5.12	-16.5	7.81	7.22	16	0.12	0.44853
all minerals, Sweden	-2.53	-6.28	1.48	2.24	13	0.12	0.25166
all minerals, tulip tree	-12.77	-16.35	-9.22	2.26	13	0.12	4e-05
barley, Fe	0.43	-6.39	8.55	4.25	13	0.12	0.91698
edible, Cd	-9.95	-26.33	5.56	10.34	18	0.12	0.28823
foliar, all minerals, soybean	-5.12	-16.32	7.74	7.22	16	0.12	0.44853
foliar, all minerals, tulip tree	-12.77	-16.24	-9.21	2.26	13	0.12	4e-05
grains, Na	-8.12	-18.17	0.82	6	13	0.12	0.15598
non-FACE, all minerals, mango tree	-33.58	-41.42	-25.18	6.69	22	0.12	< 0.00001
non-FACE, all minerals, soybean	-5.12	-16.51	7.69	7.22	16	0.12	0.44853
non-FACE, all minerals, tulip tree	-12.77	-16.19	-9.23	2.26	13	0.12	4e-05
potato, Fe	-7.28	-16.53	2.18	5.75	13	0.12	0.18437
potato, Mn	-3.33	-11.64	5.89	5.19	13	0.12	0.4988
potato, Zn	-10.78	-16.13	-5.18	3.44	13	0.12	0.00429
rice grains, Zn	-8.08	-13.97	-2.39	3.54	13	0.12	0.02683
all minerals, bean	-18.66	-27.42	-8.82	6.57	12	0.11	0.00606
all minerals, carrot	-3.36	-9.85	2.84	3.75	12	0.11	0.35423
all minerals, cotton	-3.83	-13.21	7.06	6.13	11	0.11	0.50648
all minerals, orange tree	-2.25	-5.34	0.88	1.76	11	0.11	0.20169
all minerals, turnip	0.45	-7.54	8.64	4.58	12	0.11	0.9181
barley, Zn	-15.25	-21.36	-9.95	3.91	24	0.11	0.00089
edible, all minerals, carrot	-3.36	-9.9	2.84	3.75	12	0.11	0.35423
edible, all minerals, turnip	0.45	-7.58	8.56	4.58	12	0.11	0.9181
FACE, all minerals, cotton	-3.83	-13.49	6.94	6.13	11	0.11	0.50648
FACE, Cd	-1.58	-7.28	4.36	3.4	11	0.11	0.6287
foliar, all minerals, bean	-18.66	-27.33	-8.54	6.57	12	0.11	0.00606
foliar, all minerals, cotton	-3.83	-13.17	7.35	6.13	11	0.11	0.50648
foliar, all minerals, orange tree	-2.25	-5.23	0.85	1.76	11	0.11	0.20169
non-FACE, all minerals, bean	-18.66	-27.22	-8.51	6.57	12	0.11	0.00606
non-FACE, all minerals, carrot	-3.36	-9.9	2.7	3.75	12	0.11	0.35423
non-FACE, all minerals, orange tree	-2.25	-5.25	0.85	1.76	11	0.11	0.20169
non-FACE, all minerals, radish	1.54	-9.45	14.81	6.58	21	0.11	0.80875
non-FACE, all minerals, turnip	0.45	-7.55	8.65	4.58	12	0.11	0.9181
potato tuber, Ca	-0.07	-8.5	9.69	5.2	11	0.11	0.98887
potato tuber, K	-2.04	-3.84	-0.03	1.1	11	0.11	0.07661
potato tuber, Mg	-0.7	-3.59	2.52	1.76	11	0.11	0.68244
potato tuber, P	-3.6	-7.71	0.42	2.42	11	0.11	0.13826
wild, C	4.06	0.15	10.18	2.92	12	0.11	0.17568
all minerals, mustard	-8.14	-9.59	-6.81	0.86	10	0.1	< 0.00001
barley grain, Fe	0.01	-8.46	10.77	5.54	10	0.1	0.99848
barley grain, Zn	-16.95	-23.75	-11.09	4.44	10	0.1	0.00148
edible, all minerals, mustard	-8.14	-9.58	-6.81	0.86	10	0.1	< 0.00001
edible, all minerals, radish	-1.86	-5.92	2.58	2.48	10	0.1	0.44154
edible, C	9.58	1.91	19.26	4.68	10	0.1	0.06435
Na	-15.25	-24.98	-3.32	6.9	12	0.1	0.01863
non-FACE, all minerals, mustard	-8.14	-9.58	-6.82	0.86	10	0.1	< 0.00001
potato tuber, N	-9.37	-15.52	-2.46	4.16	10	0.1	0.03129
rice grains, N	-14.61	-18.32	-10.44	2.66	10	0.1	0.00013
rice grains, P	-4.16	-9.58	0.8	3.17	10	0.1	0.18453
all minerals, alfalfa	5.91	-0.56	11.55	3.4	8	0.09	0.1095
all minerals, birch tree	-10.07	-14.28	-5.3	2.92	9	0.09	0.00448
all minerals, cheatgrass	-17.07	-23.74	-9.38	5.17	8	0.09	0.00538
all minerals, Denmark	-11.44	-17.16	-4.93	4	9	0.09	0.01112
Co	-19.92	-30.27	-8.87	8.1	8	0.09	0.01858
crop, Na	-2.01	-13.6	12.55	7.5	16	0.09	0.77571
crop, Pb	-7.28	-18.44	4.81	7.57	9	0.09	0.30376
edible, B	7.97	-0.41	17.21	4.87	9	0.09	0.12578
edible, Pb	-10.53	-20.92	0.8	7.39	8	0.09	0.13907
FACE, Mo	11.59	-0.66	27.74	7.66	9	0.09	0.15401
foliar, Al	-15.93	-25.64	-3.73	7.63	10	0.09	0.0345
foliar, Al	-15.93	-25.53	-3.96	7.63	10	0.09	0.0345
foliar, all minerals, alfalfa	5.91	-0.54	11.56	3.4	8	0.09	0.1095
foliar, all minerals, birch tree	-10.07	-14.25	-5.28	2.92	9	0.09	0.00448
foliar, all minerals, cheatgrass	-17.07	-23.75	-9.41	5.17	8	0.09	0.00538
grains, Cd	-1.14	-13.88	14.99	8.32	12	0.09	0.88376
Ni	-19.84	-34.72	-2.39	11.67	15	0.09	0.05707
non-FACE, all minerals, alfalfa	5.91	-0.61	11.33	3.4	8	0.09	0.1095
non-FACE, all minerals, birch tree	-10.07	-14.31	-5.28	2.92	9	0.09	0.00448
non-FACE, all minerals, cheatgrass	-17.07	-23.58	-9.4	5.17	8	0.09	0.00538
non-FACE, all minerals, lettuce	-1.85	-18.08	15.9	9.6	25	0.09	0.83732
non-FACE, Cd	-7.57	-26.53	12.98	12.64	17	0.09	0.50497
Pb	2.21	-9.79	17.4	7.4	15	0.09	0.75627
potato tuber, Fe	-3.32	-11.59	6.04	5.29	9	0.09	0.50674
potato tuber, Mn	2.03	-7.1	13.02	5.79	9	0.09	0.71552
potato tuber, Zn	-11.22	-18.32	-3.77	4.92	9	0.09	0.03025
potato, C	-1.13	-1.98	-0.18	0.54	8	0.09	0.05968
potato, Cu	0.73	-9.97	13.72	7.15	8	0.09	0.91336
rice grains, Ca	-2.08	-7.82	2.62	3.24	9	0.09	0.50312
wild, Al	-15.93	-25.72	-3.56	7.63	10	0.09	0.0345
wild, B	-12.27	-21.12	-3.4	5.66	15	0.09	0.02738
wild, Na	-36.6	-42.62	-29.98	6.05	8	0.09	7e-05
all minerals, cork oak tree	-29.69	-39.61	-18.78	8.86	8	0.08	0.00301
barley, Ca	-1.85	-5.5	1.85	2.29	7	0.08	0.40842
barley, K	0.33	-3.64	4.17	2.37	7	0.08	0.8842
barley, Mg	-4.62	-8.52	-0.54	2.5	7	0.08	0.08376
barley, P	-4.81	-11.54	2	4.36	7	0.08	0.2583
barley, S	-6.48	-14.01	5.55	6.64	7	0.08	0.30356
Cr	-8.94	-20.64	4.01	8.44	7	0.08	0.25853
crop, Cr	-8.94	-20.64	4.09	8.44	7	0.08	0.25853
edible, Cr	-8.94	-20.64	3.97	8.44	7	0.08	0.25853
FACE, B	11.23	2.72	21.09	5.12	7	0.08	0.06089
foliar, all minerals, cork oak tree	-29.69	-39.27	-19.11	8.86	8	0.08	0.00301
foliar, all minerals, tomato	16.14	3.9	29.79	7.02	7	0.08	0.05469
foliar, Co	-18.37	-30.21	-6.08	9.16	7	0.08	0.04643
foliar, Co	-15.1	-26.88	-1.97	8.98	8	0.08	0.08149
Mo	4.55	-12.26	20.89	9.36	13	0.08	0.61395
non-FACE, all minerals, cork oak tree	-29.69	-39.49	-19.19	8.86	8	0.08	0.00301
wheat grains, Na	-10.52	-23.62	2.34	8.9	9	0.08	0.20406
Al	-10.77	-23.53	6.13	9.52	11	0.07	0.21806
all minerals, Bangladesh	1.99	-1.52	5.26	2.08	6	0.07	0.34405
all minerals, Belgium	-14.09	-25.9	-2.85	8.95	6	0.07	0.10993
all minerals, celery	-6.15	-8.57	-3.65	1.71	5	0.07	0.01383
all minerals, fern	-7.32	-24.78	7.59	11.63	5	0.07	0.48339
all minerals, maple tree	-10.69	-14.88	-7.56	2.66	6	0.07	0.00524
all minerals, meadow fescue	-7.32	-10.92	-3.34	2.6	7	0.07	0.0295
all minerals, rapeseed	14.55	8.61	21.6	3.58	6	0.07	0.00825
all minerals, red clover	-7.85	-14.94	-2.76	4.42	5	0.07	0.10214
barley grain, Ca	-0.38	-3.4	2.73	1.95	6	0.07	0.83613
barley grain, Cu	-19.15	-33.75	-6.78	10.94	8	0.07	0.06472
barley grain, K	2.03	-0.77	5.14	1.8	6	0.07	0.2719
barley grain, Mg	-3.14	-6.35	0.63	2.21	6	0.07	0.17067
barley grain, P	-5.32	-12.82	2.33	5.21	6	0.07	0.29127
barley grain, S	-11.61	-15.1	-8.11	2.44	6	0.07	0.00248
barley, Cu	-17.22	-31.12	-5.58	9.88	9	0.07	0.06605
barley, Mn	1.55	-11.92	21.21	9.86	8	0.07	0.86602
crop, Mo	6.46	-4.42	18.25	6.6	6	0.07	0.33194
edible, Mo	2.05	-7.31	9.49	5.64	5	0.07	0.70094
FACE, C	0.2	-0.48	0.95	0.44	6	0.07	0.64077
FACE, Pb	-2.24	-15.7	12.22	9.19	6	0.07	0.78907
foliar, all minerals, celery	-6.15	-8.57	-3.65	1.71	5	0.07	0.01383
foliar, all minerals, fern	-7.32	-24.63	7.64	11.63	5	0.07	0.48339
foliar, all minerals, maple tree	-10.69	-14.95	-7.56	2.66	6	0.07	0.00524
foliar, all minerals, meadow fescue	-7.32	-10.92	-3.34	2.6	7	0.07	0.0295
foliar, all minerals, rapeseed	14.55	8.61	21.44	3.58	6	0.07	0.00825
foliar, all minerals, red clover	-7.85	-14.73	-2.64	4.42	5	0.07	0.10214
foliar, Cd	3.8	-14.64	20.54	10.71	10	0.07	0.708
foliar, Cd	3.8	-15.32	20.65	10.71	10	0.07	0.708
foliar, V	-5.8	-19.01	7.77	9.32	6	0.07	0.49557
grains, B	11.42	0.53	23.42	6.51	6	0.07	0.11889
non-FACE, Al	-11.01	-23.61	4.21	9.95	7	0.07	0.23246
non-FACE, all minerals, celery	-6.15	-8.57	-3.65	1.71	5	0.07	0.01383
non-FACE, all minerals, fern	-7.32	-24.63	7.88	11.63	5	0.07	0.48339
non-FACE, all minerals, maple tree	-10.69	-14.88	-7.56	2.66	6	0.07	0.00524
non-FACE, all minerals, meadow fescue	-7.32	-10.92	-3.34	2.6	7	0.07	0.0295
non-FACE, all minerals, rapeseed	14.55	8.61	21.78	3.58	6	0.07	0.00825
non-FACE, all minerals, red clover	-7.85	-14.83	-2.76	4.42	5	0.07	0.10214
potato foliar, Ca	0.24	-7.13	7.99	4.89	6	0.07	0.95821
potato foliar, K	-3.91	-7.63	0.23	2.58	6	0.07	0.14761
potato foliar, Mg	-3.24	-9.09	3.79	4.14	6	0.07	0.41408
potato foliar, N	-15.69	-18.57	-13.13	1.99	6	0.07	0.00022
potato foliar, P	-11.34	-18.71	-0.87	6.3	6	0.07	0.08326
potato tuber, C	-0.67	-1.6	0.36	0.6	6	0.07	0.27547
potato tuber, Cu	6.62	-5.12	21.5	8.05	6	0.07	0.40636
rice grains, Fe	-13.88	-28.62	2.24	10.46	13	0.07	0.14375
rice grains, K	-4.34	-10.27	0.23	3.83	5	0.07	0.25664
V	-5.8	-18.85	7.66	9.32	6	0.07	0.49557
wild, Co	-20.74	-32.4	-7.57	10.29	6	0.07	0.04829
wild, V	-5.8	-18.71	7.77	9.32	6	0.07	0.49557
all minerals, citrus tree	-4.17	-16.86	4.65	8.61	4	0.06	0.59327
all minerals, cucumber	-14.35	-29.97	-0.3	11.92	5	0.06	0.199
all minerals, heather shrub	-20.59	-30.7	-11.66	8.42	4	0.06	0.04596
all minerals, shrub	-3.03	-16.28	21.25	12.48	6	0.06	0.78616
all minerals, thale cress	-13.03	-22.25	3.63	9.75	6	0.06	0.16123
barley grain, Na	-2.5	-5.22	0	1.97	4	0.06	0.23134
barley, Na	-2.5	-5.22	0	1.97	4	0.06	0.23134
crop, Ni	-17.37	-36.27	4.87	15.49	9	0.06	0.1974
crop, Si	2.73	-8.42	18.45	9.65	4	0.06	0.7579
edible, Ni	-23.41	-40.57	-5.71	14.62	8	0.06	0.07499
FACE, all minerals, pine tree	-11.88	-29.76	4.61	12.13	10	0.06	0.27417
FACE, Co	-18.96	-29.03	-3.42	11.72	4	0.06	0.11611
FACE, Si	2.73	-8.42	18.45	9.65	4	0.06	0.7579
foliar, all minerals, citrus tree	-4.17	-16.86	4.65	8.61	4	0.06	0.59327
foliar, all minerals, cucumber	-14.35	-29.97	-0.3	11.92	5	0.06	0.199
foliar, all minerals, heather shrub	-20.59	-30.7	-11.66	8.42	4	0.06	0.04596
foliar, all minerals, radish	4.73	-16.33	30.99	13.28	11	0.06	0.70594
foliar, all minerals, shrub	-3.03	-16.17	20.74	12.48	6	0.06	0.78616
foliar, all minerals, thale cress	-13.03	-22.23	3.32	9.75	6	0.06	0.16123
foliar, Mo	5.45	-17.58	29.45	14.03	9	0.06	0.67951
foliar, Mo	6.15	-20.47	32.83	16.16	8	0.06	0.683
foliar, Pb	19	1.82	47.08	11.76	7	0.06	0.14216
foliar, Pb	19	1.94	46.83	11.76	7	0.06	0.14216
grains, Mo	-0.17	-9.82	8.1	6.76	4	0.06	0.97828
non-FACE, all minerals, citrus tree	-4.17	-16.86	4.65	8.61	4	0.06	0.59327
non-FACE, all minerals, cucumber	-14.35	-29.97	-0.3	11.92	5	0.06	0.199
non-FACE, all minerals, heather shrub	-20.59	-30.7	-11.66	8.42	4	0.06	0.04596
non-FACE, all minerals, thale cress	-13.03	-22.23	3.59	9.75	6	0.06	0.16123
non-FACE, Cr	-11.96	-26.23	5.07	12.24	5	0.06	0.28494
non-FACE, Ni	-15.35	-36	9.02	17.08	9	0.06	0.29492
non-FACE, Pb	5.28	-11.35	30.07	11.71	9	0.06	0.63532
potato foliar, Mn	-14.38	-24.43	-2.06	9.89	4	0.06	0.15345
potato foliar, Zn	-9.77	-14.72	-3.03	4.34	4	0.06	0.06807
rice grains, Cd	1.49	-17.49	27.02	13.1	8	0.06	0.90159
rice grains, Mg	-4.21	-16.25	4.96	7.95	4	0.06	0.56274
rice grains, Mn	3.36	-7.01	11	6.56	4	0.06	0.5909
Si	2.73	-8.42	18.45	9.65	4	0.06	0.7579
wheat grains, B	9.32	-3.17	22.33	7.91	4	0.06	0.26934
wheat grains, Cd	-6.19	-11.14	-1	4.02	4	0.06	0.15792
all minerals, berseem clover	0.46	-5.5	8.57	5.14	3	0.05	0.92014
all minerals, buckwheat	11.5	11.3	11.69	0.25	2	0.05	0.01023
all minerals, geranium	-28.85	-45.96	-6.34	47.53	2	0.05	0.4325
all minerals, larch tree	9.11	-7	28.01	25.35	2	0.05	0.68206
all minerals, Philippines	-7.71	-11.11	-4.17	5.46	2	0.05	0.27909
all minerals, rye	-0.78	-3	1.5	3.26	2	0.05	0.7893
all minerals, strawberry	-49.24	-59.52	-36.36	16.74	4	0.05	0.01491
all minerals, white lupin	-61.24	-73.5	-43.3	71.23	2	0.05	0.24294
Ba	-13.51	-17.8	-9	7.46	2	0.05	0.21452
barley grain, Mn	-0.69	-15.72	26.29	13.67	6	0.05	0.95481
barley grain, N	-15.28	-19.54	-10.79	7.57	2	0.05	0.19208
barley, N	-14.48	-19.54	-10.79	3.9	3	0.05	0.03762
Cl	-38.9	-46.67	-30	21.21	2	0.05	0.17146
crop, Cl	-38.9	-46.67	-30	21.21	2	0.05	0.17146
crop, Co	-17.42	-30	-2.57	26.34	2	0.05	0.45368
edible, Si	-8.42	-10.2	-6.6	2.82	2	0.05	0.13994
FACE, all minerals, shrub	-3.03	-16.17	20.73	12.48	6	0.05	0.78616
FACE, Cr	-0.93	-4.9	3.2	5.95	2	0.05	0.85675
FACE, Ni	-26.14	-45.09	-5.58	18.65	6	0.05	0.10989
FACE, V	7.04	2	14.6	4.39	3	0.05	0.19209
foliar, all minerals, berseem clover	0.46	-5.5	8.57	5.14	3	0.05	0.92014
foliar, all minerals, buckwheat	11.5	11.3	11.69	0.25	2	0.05	0.01023
foliar, all minerals, geranium	-28.85	-45.96	-6.34	47.53	2	0.05	0.4325
foliar, all minerals, larch tree	9.11	-7	28.01	25.35	2	0.05	0.68206
foliar, all minerals, rye	-0.78	-3	1.5	3.26	2	0.05	0.7893
foliar, all minerals, strawberry	-49.24	-59.52	-36.36	16.74	4	0.05	0.01491
foliar, all minerals, white lupin	-61.24	-73.5	-43.3	71.23	2	0.05	0.24294
foliar, Cl	-38.9	-46.67	-30	21.21	2	0.05	0.17146
foliar, Na	-24.95	-39.22	-1.25	15.13	10	0.05	0.06029
foliar, Na	-23	-36.97	-0.73	13.84	11	0.05	0.06056
foliar, Ni	-15.56	-41.1	15.23	22.16	7	0.05	0.39651
foliar, Ni	-15.56	-41.1	17	22.16	7	0.05	0.39651
foliar, Si	15.23	3.57	28.21	16.29	2	0.05	0.41067
grains, Cr	-0.93	-4.9	3.2	5.95	2	0.05	0.85675
grains, Ni	-13.75	-23.7	-2.5	18.93	2	0.05	0.44063
grains, Pb	1.93	-9.5	14.8	18.31	2	0.05	0.8986
grains, Se	3.14	-10	18.2	21.26	2	0.05	0.85807
grains, Si	-8.42	-10.2	-6.6	2.82	2	0.05	0.13994
non-FACE, all minerals, berseem clover	0.46	-5.5	8.57	5.14	3	0.05	0.92014
non-FACE, all minerals, buckwheat	11.5	11.3	11.69	0.25	2	0.05	0.01023
non-FACE, all minerals, geranium	-28.85	-45.96	-6.34	47.53	2	0.05	0.4325
non-FACE, all minerals, larch tree	9.11	-7	28.01	25.35	2	0.05	0.68206
non-FACE, all minerals, rye	-0.78	-3	1.5	3.26	2	0.05	0.7893
non-FACE, all minerals, strawberry	-49.24	-59.52	-36.36	16.74	4	0.05	0.01491
non-FACE, all minerals, white lupin	-61.24	-73.5	-43.3	71.23	2	0.05	0.24294
non-FACE, Cl	-38.9	-46.67	-30	21.21	2	0.05	0.17146
non-FACE, Co	-20.87	-35.73	-4.42	15.44	4	0.05	0.15631
non-FACE, Mo	-9.7	-42.24	22.62	31.62	4	0.05	0.69709
non-FACE, Na	-24.95	-39.03	-0.64	15.13	10	0.05	0.06029
potato foliar, C	-2.5	-2.76	-2.23	0.38	2	0.05	0.06768
potato foliar, Cu	-15.05	-19.7	-10.13	8.29	2	0.05	0.2116
potato foliar, Fe	-15.61	-32.33	5.98	17.26	4	0.05	0.30615
potato tuber, B	4.25	-6.4	16.1	16.45	2	0.05	0.76534
potato, B	4.25	-6.4	16.1	16.45	2	0.05	0.76534
rice grains, B	15.76	0	34	22.99	2	0.05	0.5
rice grains, Mo	-7.8	-15	0	12.18	2	0.05	0.5
rice grains, S	-6.33	-10	-2.5	5.83	2	0.05	0.35002
wheat grains, Cr	-0.93	-4.9	3.2	5.95	2	0.05	0.85675
wheat grains, Mo	8.1	7.7	8.5	0.52	2	0.05	0.03021
wheat grains, Ni	-13.75	-23.7	-2.5	18.93	2	0.05	0.44063
wheat grains, Pb	1.93	-9.5	14.8	18.31	2	0.05	0.8986
wheat grains, Se	3.14	-10	18.2	21.26	2	0.05	0.85807
wheat grains, Si	-8.42	-10.2	-6.6	2.82	2	0.05	0.13994
wild, Mo	2.94	-25.17	32.95	18.59	7	0.05	0.86038
wild, Ni	-23.41	-46.44	2.99	22.65	6	0.05	0.21189
wild, Pb	18.29	-0.29	51.15	14.25	6	0.05	0.2259
FACE, Al	-10.36	-31.76	31.75	26.67	4	0.04	0.63034
all minerals, Elliott's milkpea	-34.12	-55	-9.24	28.5	3	0.03	0.17838
all minerals, fenugreek	-17.19	-37.58	28.45	31.33	3	0.03	0.48592
all minerals, spinach	-43.27	-60.71	4.12	45.44	3	0.03	0.20499
crop, Se	15.67	-10	45.5	18.57	3	0.03	0.40508
edible, Se	15.67	-10	45.5	18.57	3	0.03	0.40508
FACE, Se	15.67	-10	45.5	18.57	3	0.03	0.40508
foliar, all minerals, Elliott's milkpea	-34.12	-55	-9.24	28.5	3	0.03	0.17838
foliar, all minerals, fenugreek	-17.19	-37.58	28.45	31.33	3	0.03	0.48592
foliar, all minerals, spinach	-43.27	-60.71	4.12	45.44	3	0.03	0.20499
non-FACE, all minerals, Elliott's milkpea	-34.12	-55	-9.24	28.5	3	0.03	0.17838
non-FACE, all minerals, fenugreek	-17.19	-37.58	28.45	31.33	3	0.03	0.48592
non-FACE, all minerals, spinach	-43.27	-60.71	4.12	45.44	3	0.03	0.20499
non-FACE, V	-17.1	-30.3	5.57	16.49	3	0.03	0.27126
Se	15.67	-10	45.5	18.57	3	0.03	0.40508

## Sheet: ReadMe
Notes:
This table provides supportive data for Figures 1-8 and contains the outcomes of statistical analyses of various data subsets (see 'Materials and methods' section for details). All results, except one, are for C3 plants. Means and 95% CIs are color-coded: statistically significant increases (red), statistically nonsignificant changes (black), and statistically significant decreases (blue). All re…
For any questions or for assistance with reproducing any result,
please, email at loladze@asu.edu
